# Supplementary material for: Factors associated with operational sustainability of rural water supplies in Cambodia
Source: Royal Society of Chemistry journal article supplement (doi:10.1039/c8ew00087e), 2018-01-01
Supplement: c8ew00087e1.pdf [file c8ew00087e1.pdf]

## Supplemental Data

### Factors associated with operational sustainability of rural water supplies in Cambodia

Tim Foster, Andrew Shantz, Sunetra Lala and Juliet Willetts

DOI: 10.1039/c8ew00087e

Table A1 – Cross-tabulation of handpump technology and ownership vs other explanatory variables

| Characteristic                          | All               | Technology        |                   | Ownership         |                   |
|-----------------------------------------|-------------------|-------------------|-------------------|-------------------|-------------------|
|                                         |                   | VN6               | Afridev           | Private           | Communal          |
| <b>All</b>                              | <b>608 (100%)</b> | <b>507 (100%)</b> | <b>101 (100%)</b> | <b>284 (100%)</b> | <b>324 (100%)</b> |
| <b>Technology</b>                       |                   |                   |                   |                   |                   |
| VN6                                     | 507 (83%)         | -                 | -                 | 267 (94%)         | 240 (74%)         |
| Afridev                                 | 101 (17%)         | -                 | -                 | 17 (6%)           | 84 (26%)          |
| <b>Ownership</b>                        |                   |                   |                   |                   |                   |
| Private                                 | 284 (47%)         | 267 (53%)         | 17 (17%)          | -                 | -                 |
| Communal                                | 324 (53%)         | 240 (47%)         | 84 (83%)          | -                 | -                 |
| <b>Source of funding</b>                |                   |                   |                   |                   |                   |
| Users                                   | 220 (36%)         | 216 (43%)         | 4 (4%)            | 213 (75%)         | 7 (2%)            |
| Shared                                  | 54 (9%)           | 31 (6%)           | 23 (23%)          | 7 (2%)            | 47 (15%)          |
| External                                | 334 (55%)         | 260 (51%)         | 74 (73%)          | 64 (23%)          | 270 (83%)         |
| <b>Water quality<sup>a</sup></b>        |                   |                   |                   |                   |                   |
| Good                                    | 166 (28%)         | 145 (29%)         | 21 (21%)          | 73 (27%)          | 93 (29%)          |
| Poor                                    | 427 (72%)         | 347 (71%)         | 80 (79%)          | 201 (73%)         | 226 (71%)         |
| <b>Distance to Kampot<sup>b</sup></b>   |                   |                   |                   |                   |                   |
| 35-45 km                                | 370 (61%)         | 336 (66%)         | 34 (34%)          | 219 (77%)         | 151 (47%)         |
| 45-55 km                                | 201 (33%)         | 144 (28%)         | 57 (56%)          | 48 (17%)          | 153 (47%)         |
| 55-65 km                                | 36 (6%)           | 26 (5%)           | 10 (6%)           | 17 (6%)           | 19 (6%)           |
| <b>Handpump age (years)<sup>c</sup></b> |                   |                   |                   |                   |                   |
| 1-2 yrs                                 | 209 (35%)         | 196 (39%)         | 13 (13%)          | 91 (32%)          | 118 (37%)         |
| 3-5 yrs                                 | 168 (28%)         | 141 (28%)         | 27 (27%)          | 60 (21%)          | 108 (34%)         |
| 6-10 yrs                                | 142 (24%)         | 119 (24%)         | 23 (23%)          | 105 (37%)         | 37 (12%)          |
| ≥11 yrs                                 | 84 (14%)          | 48 (10%)          | 36 (36%)          | 27 (10%)          | 57 (18%)          |

<sup>a</sup> Information on water quality perceptions not obtained for 15 water points. <sup>b</sup> GPS coordinates not obtained for one water point. <sup>c</sup> Information on handpump age not obtained for five water points

Table A2 - Results for univariable logistic regression with 'functional status' status as outcome variable

| Explanatory variable           | All handpumps           |                  | Handpumps aged ≤10 years |              |
|--------------------------------|-------------------------|------------------|--------------------------|--------------|
|                                | OR (95% CI)             | p-value          | OR (95% CI)              | p-value      |
| Technology: VN6 vs Afridev     | 1.26 (0.65-2.44)        | 0.498            | 0.83 (0.32-2.14)         | 0.706        |
| Ownership: Private vs Communal | <b>2.19 (1.24-3.88)</b> | <b>0.007</b>     | <b>3.51 (1.69-7.30)</b>  | <b>0.001</b> |
| Funding: Users vs External     | 1.70 (0.97-2.97)        | 0.062            | <b>2.37 (1.20-4.68)</b>  | <b>0.013</b> |
| Funding: Shared vs External    | 1.15 (0.37-3.54)        | 0.808            | 1.68 (0.42-6.72)         | 0.462        |
| Funding: Users vs Shared       | 1.48 (0.46-4.76)        | 0.510            | 1.41 (0.30-6.58)         | 0.665        |
| Water quality: Good vs Poor    | <b>4.19 (1.74-10.1)</b> | <b>0.001</b>     | <b>6.10 (1.60-23.2)</b>  | <b>0.008</b> |
| Distance to provincial capital | <b>0.89 (0.82-0.97)</b> | <b>0.005</b>     | <b>0.91 (0.84-1.00)</b>  | <b>0.039</b> |
| Handpump age                   | <b>0.92 (0.88-0.96)</b> | <b>&lt;0.001</b> | <b>0.90 (0.83-0.97)</b>  | <b>0.009</b> |

OR = odds ratio. Bold values indicate statistical significance (p<0.05)

Table A3 - Results for univariable logistic regression with 'no previous breakdowns' as outcome variable

| Explanatory variable           | All handpumps           |                  | Handpumps aged ≤10 years |                  |
|--------------------------------|-------------------------|------------------|--------------------------|------------------|
|                                | OR (95% CI)             | p-value          | OR (95% CI)              | p-value          |
| Technology: VN6 vs Afridev     | <b>0.41 (0.25-0.69)</b> | <b>0.001</b>     | <b>0.20 (0.10-0.43)</b>  | <b>&lt;0.001</b> |
| Ownership: Private vs Communal | <b>0.43 (0.24-0.76)</b> | <b>0.003</b>     | <b>0.36 (0.20-0.64)</b>  | <b>0.001</b>     |
| Funding: Users vs External     | <b>0.36 (0.21-0.63)</b> | <b>&lt;0.001</b> | <b>0.32 (0.18-0.57)</b>  | <b>&lt;0.001</b> |
| Funding: Shared vs External    | 0.85 (0.47-1.51)        | 0.571            | 1.24 (0.56-2.73)         | 0.591            |
| Funding: Users vs Shared       | <b>0.43 (0.19-0.96)</b> | <b>0.040</b>     | <b>0.26 (0.10-0.69)</b>  | <b>0.007</b>     |
| Water quality: Good vs Poor    | 1.88 (0.84-4.22)        | 0.126            | 1.84 (0.76-4.42)         | 0.174            |
| Distance to provincial capital | 0.96 (0.91-1.03)        | 0.248            | 0.99 (0.93-1.05)         | 0.687            |
| Handpump age                   | <b>0.86 (0.77-0.96)</b> | <b>0.006</b>     | <b>0.75 (0.61-0.92)</b>  | <b>0.007</b>     |

OR = odds ratio. Bold values indicate statistical significance (p<0.05)

Table A4 - Results for univariable logistic regression with 'repaired at most recent breakdown' as outcome variable

| Explanatory variable           | All handpumps           |              | Handpumps aged ≤10 years |              |
|--------------------------------|-------------------------|--------------|--------------------------|--------------|
|                                | OR (95% CI)             | p-value      | OR (95% CI)              | p-value      |
| Technology: VN6 vs Afridev     | 2.01 (0.75-5.36)        | 0.163        | 2.62 (0.57-12.1)         | 0.216        |
| Ownership: Private vs Communal | 1.67 (0.80-3.51)        | 0.175        | 1.81 (0.87-3.77)         | 0.112        |
| Funding: Users vs External     | 1.21 (0.68-2.12)        | 0.517        | 1.24 (0.71-2.19)         | 0.367        |
| Funding: Shared vs External    | 1.43 (0.26-7.97)        | 0.683        | 1.49 (0.13-16.8)         | 0.735        |
| Funding: External vs Shared    | 0.84 (0.11-6.34)        | 0.868        | 0.84 (0.05-13.1)         | 0.900        |
| Water quality: Good vs Poor    | <b>1.56 (1.15-2.12)</b> | <b>0.004</b> | <b>1.94 (1.24-3.05)</b>  | <b>0.004</b> |
| Distance to provincial capital | <b>0.91 (0.86-0.96)</b> | <b>0.001</b> | <b>0.91 (0.84-0.98)</b>  | <b>0.017</b> |
| Handpump age                   | 0.97 (0.92-1.02)        | 0.272        | 0.97 (0.90-1.05)         | 0.446        |

OR = odds ratio. Bold values indicate statistical significance (p<0.05)
